# Supplementary material for: Improvement of growth, yield and associated bacteriome of rice by the application of probiotic Paraburkholderia and Delftia
Source: PubMed Central journal article supplement (PMC10375411; doi:10.3389/fmicb.2023.1212505), 2023-07-14
Supplement: Data_Sheet_1.pdf [file Data_Sheet_1.pdf]

## Supplementary Figures

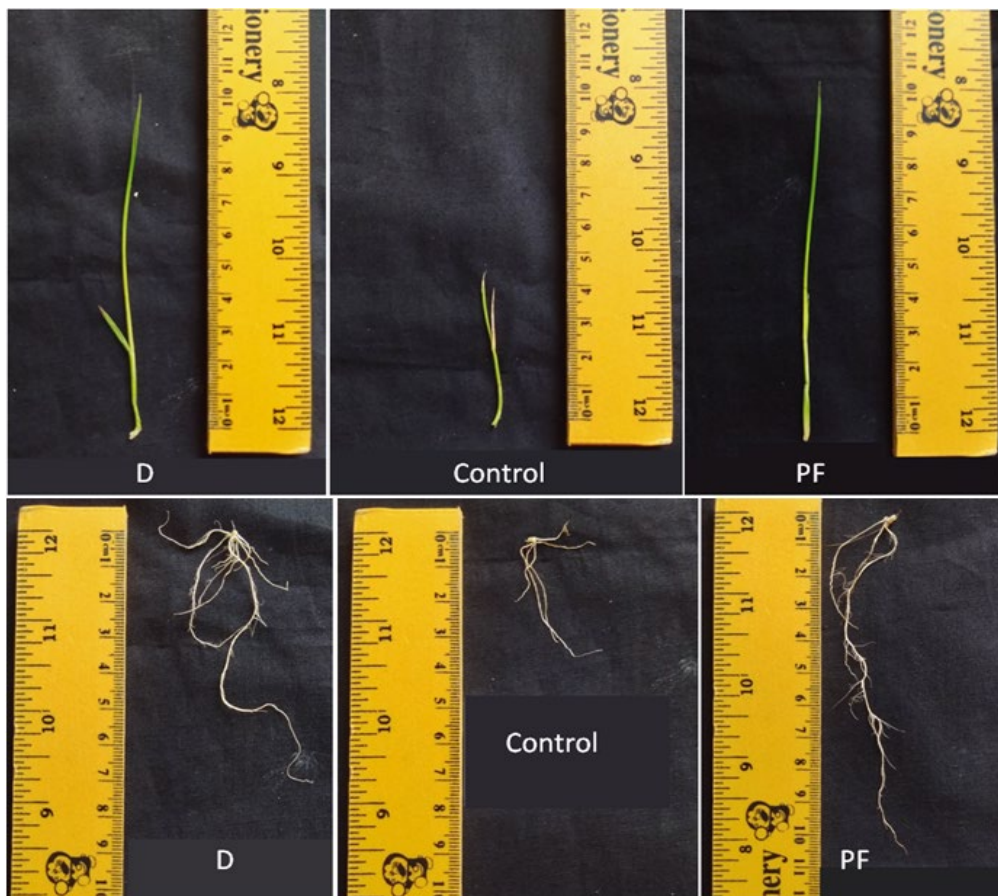

**Figure S1:** Representative shoot and root lengths of seedlings at 15 DAI in cm; randomly selected representative seedlings from both of the treatments and untreated controls showing the lengths in cm scale. D represents the seedlings treated with BTL-M2; Control is the untreated control seedlings and PF represents the seedlings treated with BRRh-4.

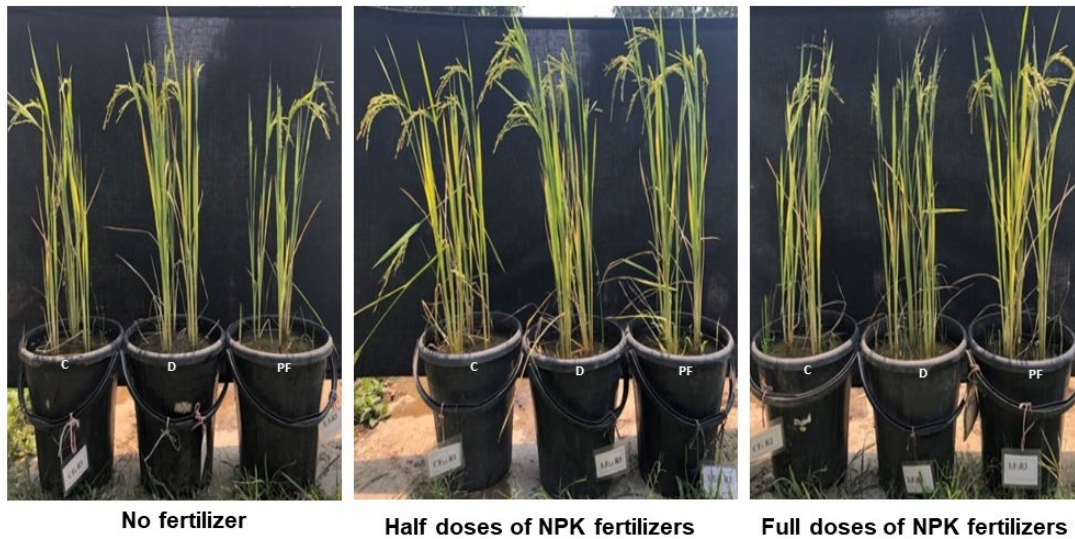

**Figure S2:** Effect of BTL-M2 (D) and BRRh-4 (PF) on growth of rice under varying doses of recommended nitrogenous (N), phosphatic (P) and potassium (K) fertilizers. Here, C represents non-treated controls. Zero dose or no chemical fertilizers used. Half dose: 50% of recommended N, P, and K fertilizers used. Full dose: 100% of recommended N, P, and K fertilizers used.

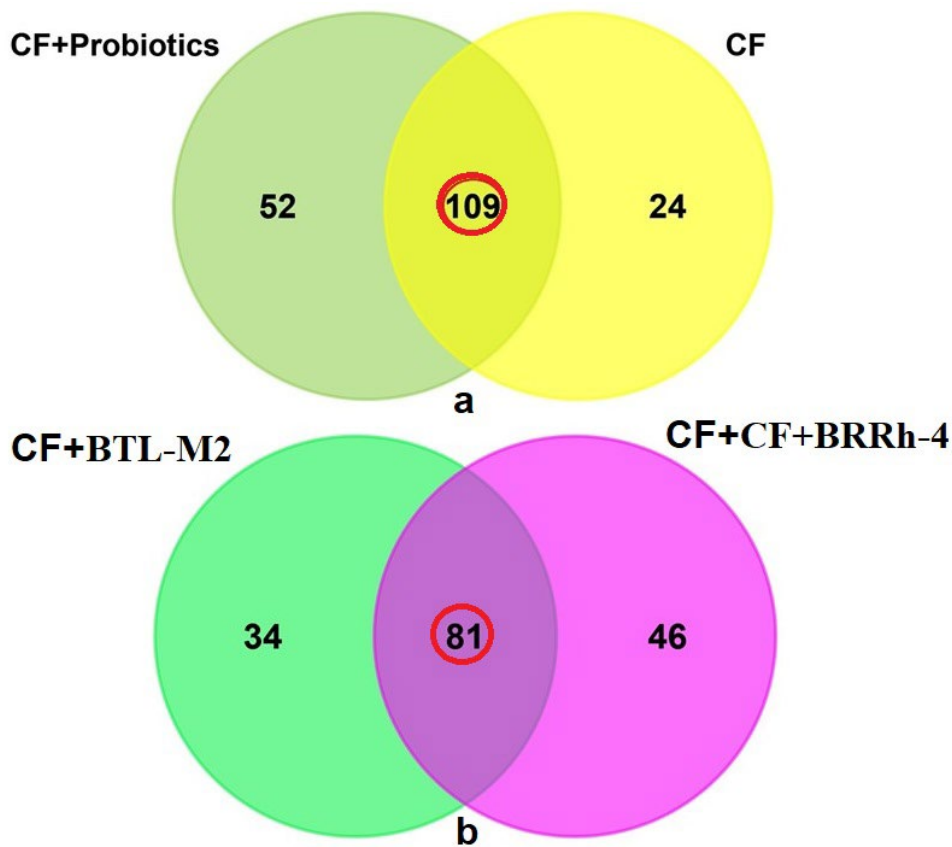

**Figure S3:** Microbiome diversity between chemical fertilizer (CF), and CF and probiotics bacteria treated metagenomes. (a) Venn diagram representing the unique and shared bacterial genera detected in these metagenomes. A total of 185 bacterial genera were detected in both metagenomes, and of them 109 genera were found to be common in the given conditions. (b) Microbiome diversity between CF + BTL-M2 and CF + BRRh-4 treated metagenomes. Venn diagram representing the unique and shared bacterial genera detected in CF + BTL-M2 and CF + BRRh-4 treated samples. A total of 161 bacterial genera were detected in both metagenomes where 81 genera were found to be shared between the two conditions.

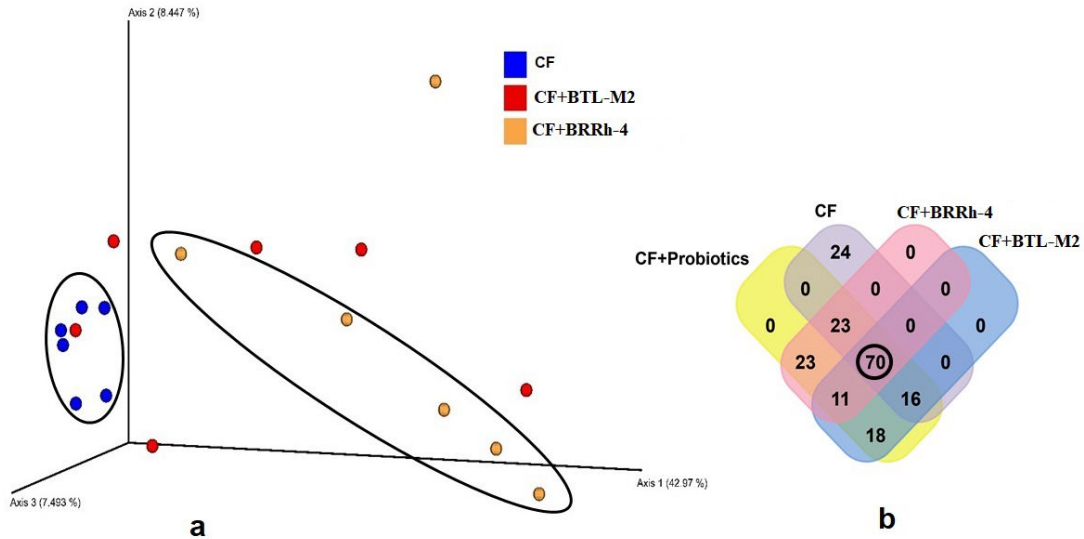

**Figure S4: Taxonomic composition of microbiome in chemical fertilizer (CF), and CF + probiotics treatment (at genus level).** (a) The PCA plot (beta diversity) based on Bray-Curtis metrics showed that most of the CF samples (blue colored) clustered closely (encircled in black) while the samples of CF + probiotics treated samples were distributed diversely (red and yellow colored) showing significant (Kruskal-Wallis test,  $p = 0.002$ ) microbial disparity between the sample groups. However, among the probiotics treated samples more diversity differences were found in CF + BTL-M2 treated (red colored) sample group compared to CF + BRRh-4 treated (yellow colored) sample group (encircled in black). (b) Venn diagram comparison of bacterial genera in CF, CF + BTL-M2 and CF + BRRh-4 treated samples. Microbiome sharing between the conditions are indicated by black circles. More information on taxonomic composition and diversity can be found in Data S1.

## Supplementary Tables

**Table S1:** Taxonomic distribution of microbiome at phylum level in root and rhizosphere soil metagenomes.

| <b>Phyla</b>    | <b>Root</b> | <b>Rhizosphere soils</b> |
|-----------------|-------------|--------------------------|
| Bacteroidetes   | 42.910      | 67.254                   |
| Firmicutes      | 29.031      | 17.320                   |
| Proteobacteria  | 13.513      | 14.188                   |
| Planctomycetes  | 5.779       | 0.002                    |
| Thermi          | 4.151       | 0.004                    |
| Actinobacteria  | 2.015       | 1.125                    |
| Verrucomicrobia | 1.076       | 0.093                    |
| Chloroflexi     | 0.875       | 0.00                     |
| Spirochaetes    | 0.184       | 0.00                     |
| Euryarchaeota   | 0.236       | 0.014                    |
| Nitrospirae     | 0.092       | 0.00                     |
| Cyanobacteria   | 0.140       | 0.00                     |

**Table S2:** Taxonomic distribution of microbiome in root and rhizosphere soil metagenomes at order level.

| <b>Orders</b>             | <b>Root</b> | <b>Rhizosphere soils</b> |
|---------------------------|-------------|--------------------------|
| <i>Bacteroidales</i>      | 39.604      | 67.254                   |
| <i>Bacillales</i>         | 19.187      | 1.539                    |
| <i>Clostridiales</i>      | 9.437       | 15.473                   |
| <i>Planctomycetales</i>   | 5.213       | 0.002                    |
| <i>Deinococcales</i>      | 4.151       | 0.004                    |
| <i>Flavobacteriales</i>   | 3.157       | 0.000                    |
| <i>Sphingomonadales</i>   | 2.709       | 0.000                    |
| <i>Vibrionales</i>        | 2.563       | 6.272                    |
| <i>Rhizobiales</i>        | 2.513       | 0.077                    |
| <i>Burkholderiales</i>    | 1.798       | 1.369                    |
| <i>Actinomycetales</i>    | 1.682       | 1.125                    |
| <i>Rhodospirillales</i>   | 1.345       | 3.525                    |
| <i>Aeromonadales</i>      | 0.493       | 0.875                    |
| <i>Enterobacteriales</i>  | 0.762       | 0.558                    |
| <i>Pseudomonadales</i>    | 0.342       | 0.675                    |
| <i>Pasteurellales</i>     | 0.000       | 0.492                    |
| <i>Chthoniobacterales</i> | 0.840       | 0.002                    |
| <i>Erysipelotrichales</i> | 0.392       | 0.179                    |
| <i>Alteromonadales</i>    | 0.055       | 0.287                    |
| <i>Gemmatales</i>         | 0.485       | 0.000                    |
| <i>Anaerolineales</i>     | 0.438       | 0.000                    |
| <i>Caldilineales</i>      | 0.363       | 0.000                    |
| <i>Bifidobacteriales</i>  | 0.332       | 0.000                    |
| <i>Xanthomonadales</i>    | 0.239       | 0.031                    |
| Other orders              | 1.902       | 0.261                    |

**Table S3:** Taxonomic distribution of top 30 bacterial genera in root and rhizosphere soil metagenomes.

| <b>Genera</b>           | <b>Root (R)</b> | <b>Rhizosphere soil (S)</b> |
|-------------------------|-----------------|-----------------------------|
| <i>Prevotella</i>       | 24.961          | 52.022                      |
| Unclassified            | 25.122          | 3.016                       |
| <i>Bacteroides</i>      | 2.607           | 12.383                      |
| <i>Faecalibacterium</i> | 3.901           | 9.494                       |
| <i>Bacillus</i>         | 11.030          | 1.205                       |
| <i>Vibrio</i>           | 1.775           | 5.945                       |
| <i>Roseomonas</i>       | 0.814           | 3.391                       |
| <i>Planctomyces</i>     | 4.050           | 0.013                       |
| <i>Deinococcus</i>      | 2.961           | 0.021                       |
| <i>Ruminococcus</i>     | 0.384           | 1.762                       |
| <i>Chryseobacterium</i> | 2.301           | 0.000                       |
| <i>Exiguobacterium</i>  | 1.909           | 0.000                       |
| <i>Dialister</i>        | 0.000           | 1.161                       |
| <i>Novosphingobium</i>  | 1.563           | 0.000                       |
| <i>Sutterella</i>       | 0.219           | 0.981                       |
| <i>Butyrivibrio</i>     | 0.000           | 1.066                       |
| <i>Brevibacterium</i>   | 0.338           | 0.801                       |
| <i>Oscillospira</i>     | 0.373           | 0.723                       |
| <i>Succinivibrio</i>    | 0.184           | 0.836                       |
| <i>Megasphaera</i>      | 0.142           | 0.665                       |
| <i>Ancylobacter</i>     | 0.908           | 0.074                       |
| <i>Candidatus</i>       | 0.750           | 0.002                       |
| <i>Staphylococcus</i>   | 0.500           | 0.126                       |
| <i>Haemophilus</i>      | 0.000           | 0.475                       |
| <i>Corynebacterium</i>  | 0.570           | 0.033                       |
| <i>Parabacteroides</i>  | 0.370           | 0.172                       |
| <i>Massilia</i>         | 0.596           | 0.000                       |
| <i>Nocardioides</i>     | 0.591           | 0.000                       |
| <i>Enhydrobacter</i>    | 0.208           | 0.282                       |
| Other genera            | 10.868          | 3.352                       |
